# Supplementary material for: Facile and Rapid Formation of Giant Vesicles from Glass Beads
Source: MDPI journal article supplement (doi:10.3390/polym10010054), 2018-01-09
Supplement: s1 [file s1]

# Supporting Information for

Article

## Facile and Rapid Formation of Giant Vesicles from Glass Beads

Radu Tanasescu <sup>1</sup>, Ute Mettal <sup>1</sup>, Adai Colom <sup>2,3</sup>, Aurélien Roux <sup>2,3</sup> and Andreas Zumbuehl <sup>1,3,\*</sup>

<sup>1</sup> Department of Chemistry, University of Fribourg, Chemin du Musée 9, 1700 Fribourg, Switzerland; radu.tanasescu@unifr.ch (R.T.); ute.mettal@unifr.ch (U.M.)

<sup>2</sup> Department of Biochemistry, University of Geneva, 30, Quai Ernest-Ansermet, 1211 Geneva, Switzerland; adai.colom@unige.ch (A.C.); aurelien.roux@unige.ch (A.R.)

<sup>3</sup> National Centre of Competence in Research in Chemical Biology, 1211 Geneva, Switzerland

\* Correspondence: andreas.zumbuehl@unifr.ch; Tel.: +41-26-300-8794

### Glass beads used after 1 year in the freezer

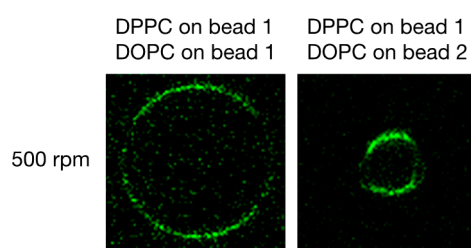

**Figure S1.** Representative confocal micrographs of DPPC/DOPC vesicles hydrated at 65 °C and 500 rpm from glass beads that stayed 1 year in the freezer at -20 °C. Each square is sized to 20  $\mu\text{m} \times 20 \mu\text{m}$ . The micrographs were recorded using 1 wavelength only, therefore no general polarization image is provided. The vesicles were artificially colored green for increased visibility.

### Complete set of general polarization histograms

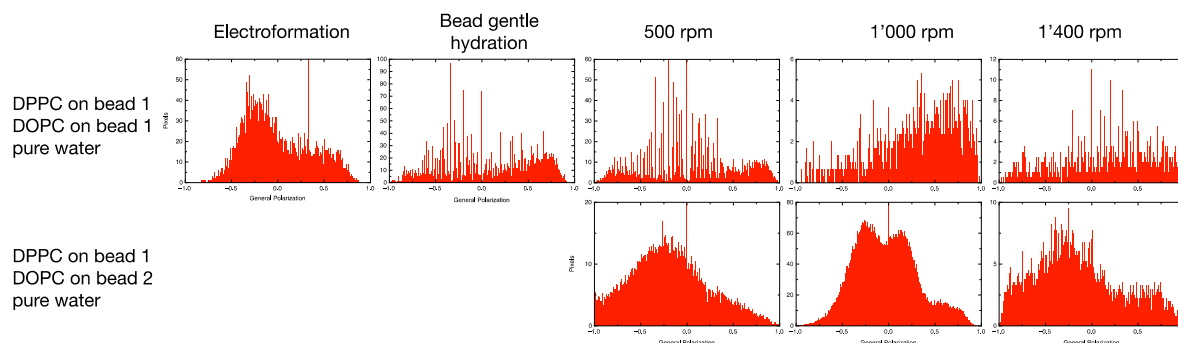

**Figure S2.** Complete set of general polarization histograms of vesicles formulated in pure water calculated from overview micrographs of the GV. Each histogram summarizes at least 20 GVs.

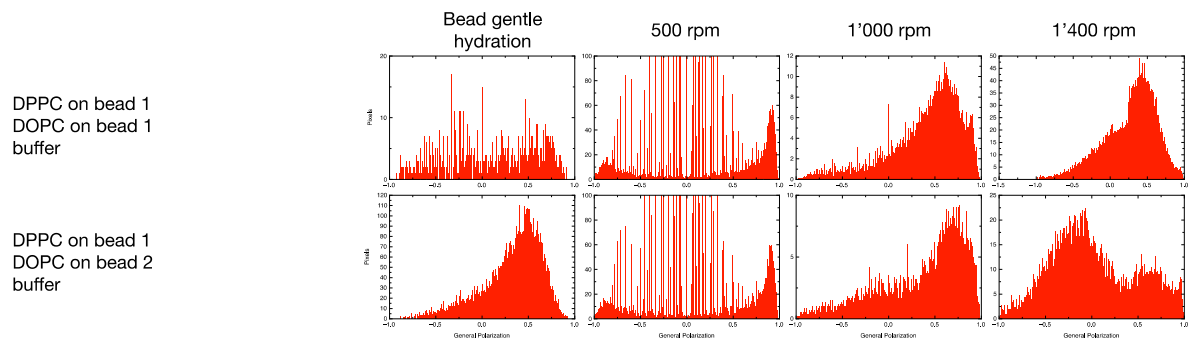

**Figure S1.** Complete set of general polarization histograms of vesicles formulated in PBS buffer in a sucrose/glucose gradient. The data were calculated from overview micrographs of the GV. Each histogram summarizes at least 20 GVs.
